# Supplementary material for: Performing homogeneous catalytic ozonation using heterogeneous Mn2+-bonded oxidized carbon nanotubes by self-driven pH variation induced reversible desorption and adsorption of Mn2+
Source: Royal Society of Chemistry journal article supplement (doi:10.1039/c9en00204a), 2019-01-01
Supplement: c9en00204a1.pdf [file c9en00204a1.pdf]

## Supporting Information for

### **Performing homogeneous catalytic ozonation using heterogeneous Mn<sup>2+</sup>-bonded oxidized carbon nanotube by self-driven pH variation induced reversible desorption and adsorption of Mn<sup>2+</sup>**

*Jing Wang,<sup>†</sup> Xie Quan,<sup>\*†</sup> Shuo Chen,<sup>†</sup> Hongtao Yu,<sup>†</sup> and Yongsheng Chen<sup>‡</sup>*

<sup>†</sup>Key Laboratory of Industrial Ecology and Environmental Engineering (Ministry of Education), School of Environmental Science and Technology, Dalian University of Technology, Dalian 116024, China

<sup>‡</sup>School of Civil and Environmental Engineering, Georgia Institute of Technology, Atlanta, Georgia 30332, United States

\* Corresponding author. Tel: +86-411-84706140.

E-mail address: [quanxie@dlut.edu.cn](mailto:quanxie@dlut.edu.cn)

This supplementary material is a 19-page document, which consists of 7 tables, 24 figures, experimental section, references and this cover page.

## Experimental Section

### Chemicals and Materials

Pristine CNTs (multiwalled, length: 15  $\mu\text{m}$ , outer diameter: 10-20 nm) was acquired from Shenzhen Nanotech Port Co., Ltd., China. 5-tert-Butoxycarbonyl-5-methyl-1-pyrroline-N-oxide (BMPO) was provided by the Dojindo China Co., Ltd. (Shanghai, China). 2,2,6,6-tetramethyl-4-piperidinol (TEMP) was purchased from the Shanghai Aladdin Biochemical Technology Co., Ltd. (Shanghai, China). Other chemicals and reagents used in all experiments were of analytical grade and purchased from the Damao chemical Reagent Factory (Tianjin, China). Ultrapure water (resistivity  $>18\text{ M}\Omega\text{ cm}$ ) was obtained from an OKP ultrapure water system and was used in all experiments.

### GC-MS Analysis

To allow gas chromatography-mass spectrometry (GC-MS) measurement of non-water, the first step of detecting organic acid intermediates was to esterify and extract samples by the procedure described by Li et al.<sup>1</sup> Typically, 6 mL sample were esterified in a 40-mL sealed bottle at 75 °C for 40 min by adding 4 mL of n-butanol (HPLC grade) and 4 mL of concentrated HCl (37%). After cooling, 12 mL of hexane (HPLC grade) was added into the mixed solution with violent shaking to extract the esterified products. The extraction was repeated twice. The extracted liquid was dewatered by anhydrous sodium sulfate and concentrated to 200  $\mu\text{L}$  by nitrogen purging. Finally, the obtained samples were analyzed by GC-MS. The Agilent 6890N GC (Agilent Technologies, Santa Clara, CA, USA) equipped with an Agilent DB-5MS capillary column (30 m  $\times$  0.250 mm  $\times$  0.25  $\mu\text{m}$ ) followed by an Agilent 5975 MS detector. The initial column temperature began at 50 °C and ramped at 20 °C  $\text{min}^{-1}$  to 280 °C with a holding time of 2 min for each increment. For detecting aromatic intermediates, the samples were extracted by the mixture of n-hexane and dichloromethane ( $V_{\text{n-hexane}}: V_{\text{dichloromethane}} = 1:1$ ). The initial column temperature began at 60 °C and ramped at 10 °C  $\text{min}^{-1}$  to 80 °C, then ramped at 4 °C  $\text{min}^{-1}$  to 100 °C, and finally ramped at 10 °C  $\text{min}^{-1}$  to 300 °C with a holding time of 10 min.

## **The Quantification of Organic Acid Intermediates**

*Maleic Acid detected by HPLC.* An HPLC equipped with a UV detector (Photodiode Array Detector 2996) and a SunFire C18 column (5  $\mu\text{m}$   $\times$  4.6 mm  $\times$  250 mm, Waters) was used to detect the concentration of maleic acid. The mobile phase was  $\text{KH}_2\text{PO}_4$ - $\text{H}_3\text{PO}_4$  buffer solution (0.01 mM)/methanol at a volume ratio of 97/3, at a temperature of 35  $^\circ\text{C}$ . The flow rate was set at 0.7 mL  $\text{min}^{-1}$  ( $\lambda = 220$  nm).

*Oxalic Acid detected by HPLC.* The mobile phase was  $\text{NH}_4\text{H}_2\text{PO}_4$  solution (2 wt%) / methanol at a volume ratio of 98/2. The temperature was 25  $^\circ\text{C}$ , and the flow rate was set at 0.7 mL  $\text{min}^{-1}$  ( $\lambda = 197$  nm).

*Acetic Acid and Formic Acid detected by IC.* An IC equipped with a ThermoScientific<sup>®</sup> Dionex IonPac AG23 Guard column (4  $\times$  50 mm) was used to detect the concentrations of acetic acid and formic acid. The mobile phase was 4.5 mM  $\text{Na}_2\text{CO}_3$ /0.8 mM  $\text{NaHCO}_3$ .

## **EPR experiments**

*BMPO- $\bullet\text{OH}$  spin adducts:* Center field: 3385.0 G; Sweep Width: 100 G; Modulation Frequency: 100 kHz; Modulation Amplitude: 1.00 G; sweep time, 40.96 s; microwave frequency, 9.528 GHz; microwave power, 21.43 mW.

*BMPO- $\text{O}_2^{\cdot-}$  spin adducts:* Center field: 3360.0 G; Sweep Width: 200 G; Modulation Frequency: 100 kHz; Modulation Amplitude: 2.00 G; sweep time, 327.68 s; microwave frequency, 9.445 GHz; microwave power, 16.26 mW.

*TEMP- $^1\text{O}_2$  spin adducts:* Center field: 3360.0 G; Sweep Width: 100 G; Modulation Frequency: 100 kHz; Modulation Amplitude: 2.00 G; sweep time, 245.76 s; microwave frequency, 9.446 GHz; microwave power, 2.80 mW.

## **Batch Desorption Experiment**

The effect of pH on the adsorption of dissolved  $\text{Mn}^{2+}$  on OCNT surfaces was carried out in a 0.2 L beaker at room temperature. The concentration of  $\text{Mn}^{2+}$ -OCNT was controlled to be the same as the  $\text{Mn}^{2+}$ -OCNT/ $\text{O}_3$  system. The pH of suspension was first adjusted to 3.5 by 0.1 M HCl solution. The adsorption experiments of dissolved  $\text{Mn}^{2+}$  on OCNT surfaces were examined after the desorption equilibrium. Briefly, the  $\text{Mn}^{2+}$ -OCNT suspension was dispersed by ultrasonic dispersion, then the pH of

suspension was first adjusted to 3.5 and kept stirring for 30 min. Five milliliters of the suspension was sampled and filtrated through a 0.22  $\mu\text{m}$  acetate fiber filters at predetermined time intervals. Then the adsorption experiments were carried out under different pH values. The pH of the suspension was adjusted by 0.1 M NaOH solution. The suspension was kept shaken for 10 min under each pH value, and was sampled to test the  $\text{Mn}^{2+}$  concentration in solution.

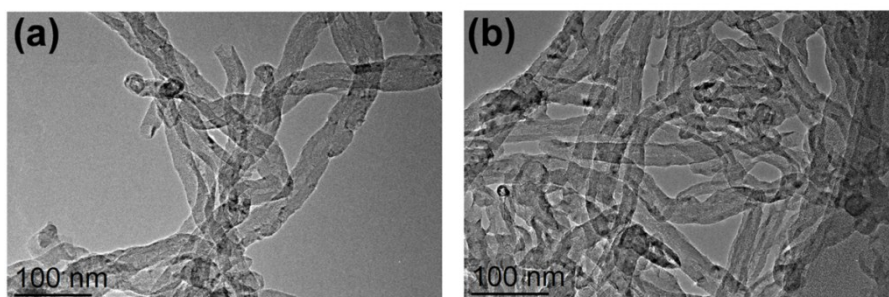

**Fig. S1** TEM image of (a) pristine CNT and (b) CNT-80°C

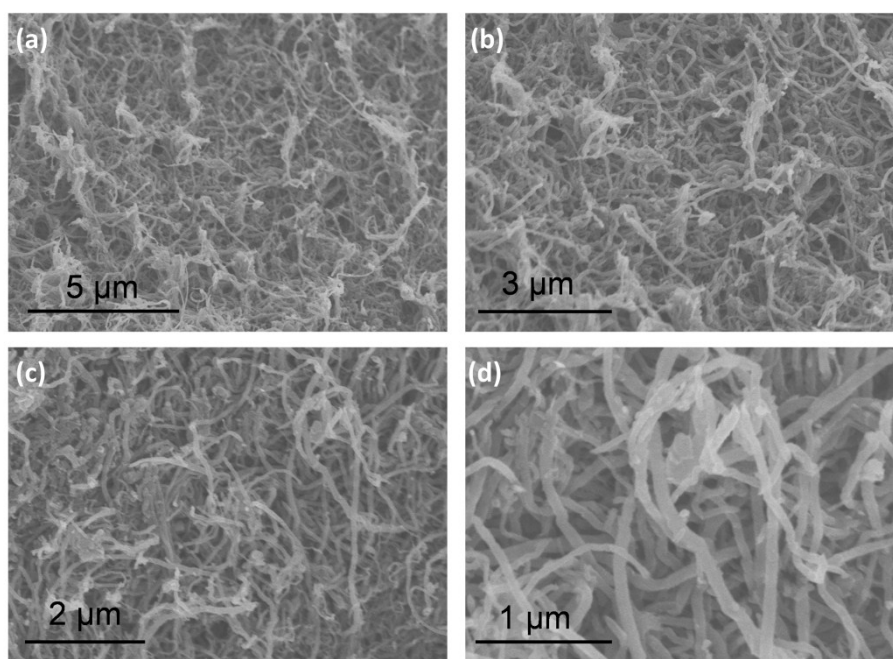

**Fig. S2** SEM images of  $\text{Mn}^{2+}$ -OCNT with different sizes.

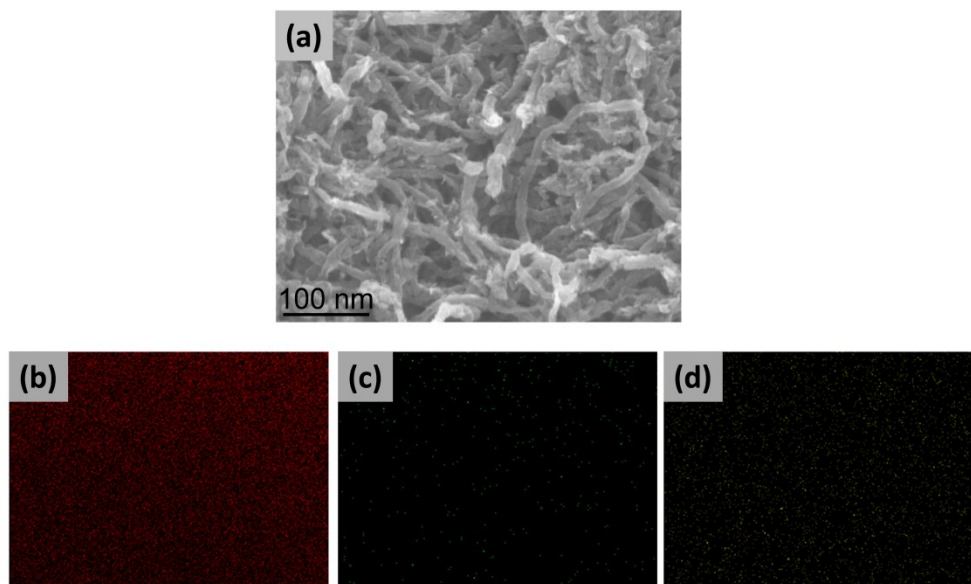

**Fig. S3** SEM image (a), and EDS maps: C map (b), O map (c), and Mn map (d) of the as-synthesized  $\text{Mn}^{2+}$ -OCNT.

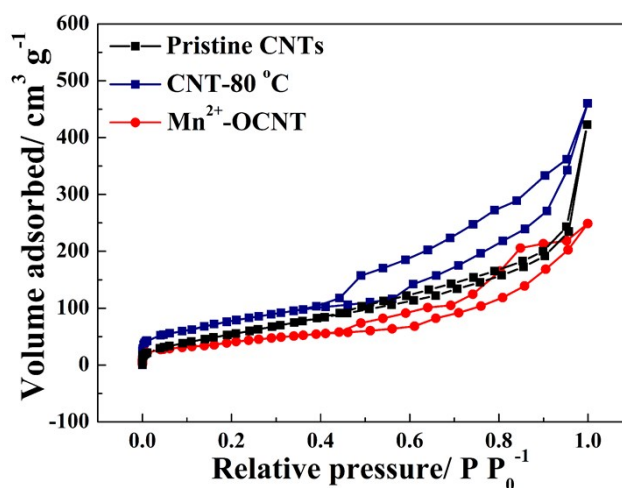

**Fig. S4** Nitrogen adsorption-desorption isotherms of samples.

**Table S1** Textural properties of different samples.

| Catalysts              | SSAs<br>( $\text{m}^2 \text{g}^{-1}$ ) | Average pore<br>diameter (nm) | Pore volume<br>( $\text{cm}^3 \text{g}^{-1}$ ) |
|------------------------|----------------------------------------|-------------------------------|------------------------------------------------|
| Pristine CNTs          | 210.0                                  | 11.2                          | 0.59                                           |
| CNT-80°C               | 284.1                                  | 10.0                          | 0.71                                           |
| $\text{Mn}^{2+}$ -OCNT | 153.6                                  | 10.0                          | 0.38                                           |

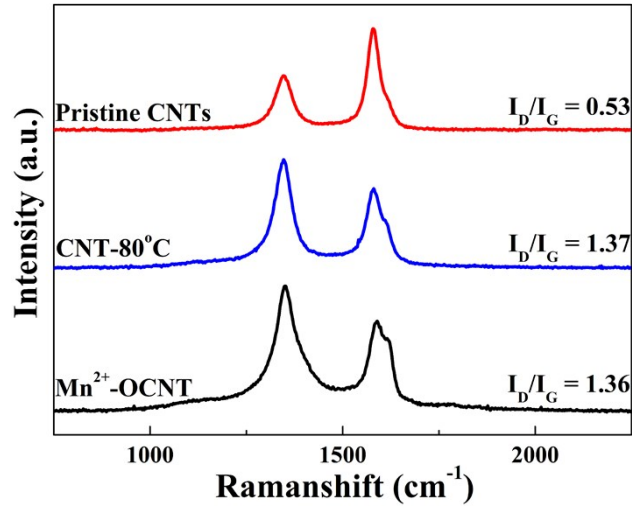

**Fig. S5** Raman spectra of samples.

**Table S2** The element composition of  $\text{Mn}^{2+}$ -OCNT and  $\text{Mn}^{2+}$ - $\text{CNT}_{\text{HNO}_3}$  detected by XPS measurement.

| Samples                                        | C (at%) | O (at%) | Mn (at%) |
|------------------------------------------------|---------|---------|----------|
| $\text{Mn}^{2+}$ -OCNT                         | 86.01   | 12.64   | 1.35     |
| $\text{Mn}^{2+}$ - $\text{CNT}_{\text{HNO}_3}$ | 97.55   | 2.32    | 0.13     |

**Table S3** Mn content in various samples (ICP results).

| Samples             | $\text{Mn}^{2+}$ -OCNT | $\text{Mn}^{2+}$ - $\text{CNT}_{\text{HNO}_3}$ | 1 <sup>st</sup> -used $\text{Mn}^{2+}$ -<br>OCNT | 2 <sup>nd</sup> -used $\text{Mn}^{2+}$ -<br>OCNT | 3 <sup>rd</sup> -used $\text{Mn}^{2+}$ -<br>OCNT | Alkali-treated<br>$\text{Mn}^{2+}$ -OCNT |
|---------------------|------------------------|------------------------------------------------|--------------------------------------------------|--------------------------------------------------|--------------------------------------------------|------------------------------------------|
| Mn content<br>(wt%) | 1.85                   | 0.04                                           | 1.63                                             | 1.48                                             | 1.38                                             | 1.83                                     |

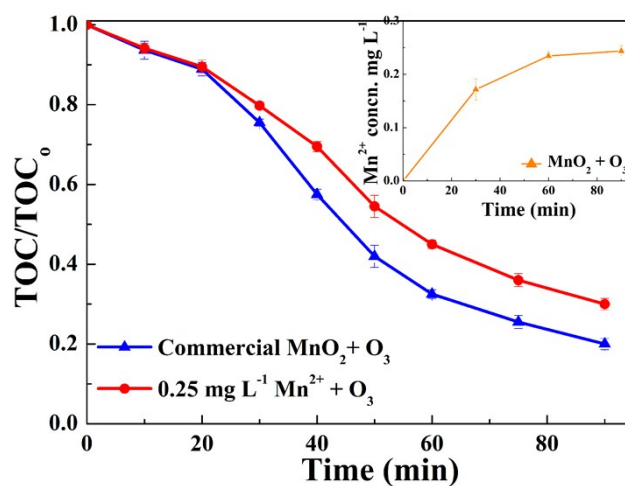

**Fig. S6** Mineralization efficiencies of phenol in different reaction systems, and Mn<sup>2+</sup> concentration in solution as a function of time in MnO<sub>2</sub>/O<sub>3</sub> system (the inset in Fig. S6) (Experimental conditions: [phenol] = 20 mg L<sup>-1</sup>, [O<sub>3</sub>] = 10 mg L<sup>-1</sup>, initial pH 6.2).

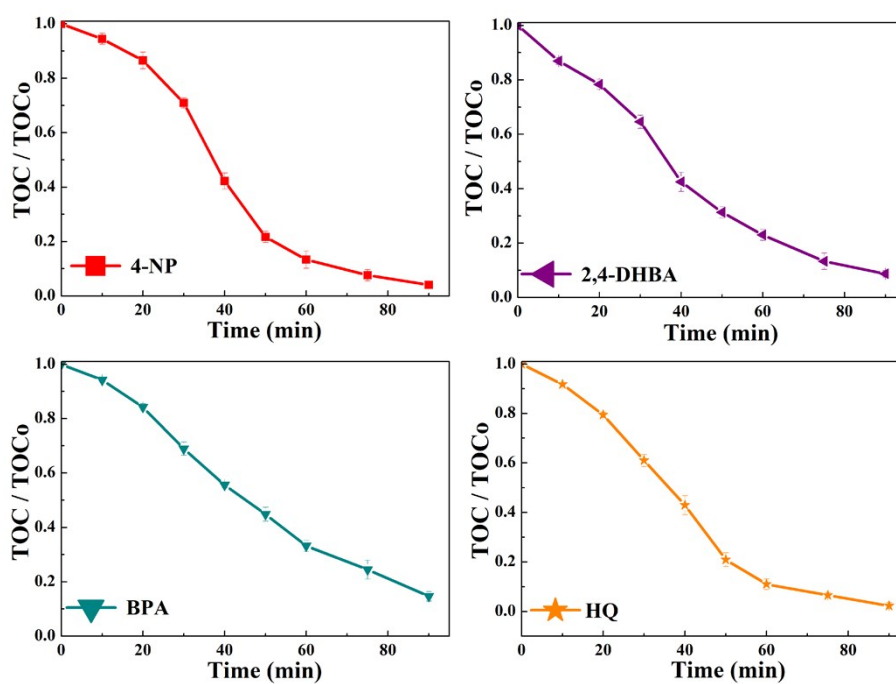

**Fig. S7** Mineralization efficiencies of different phenol compounds in Mn<sup>2+</sup>-OCNT/O<sub>3</sub> system (Experimental conditions: [pollutant] = 20 mg L<sup>-1</sup>, [Mn<sup>2+</sup>-OCNT] = 0.028 g L<sup>-1</sup>, [O<sub>3</sub>] = 10 mg L<sup>-1</sup>).

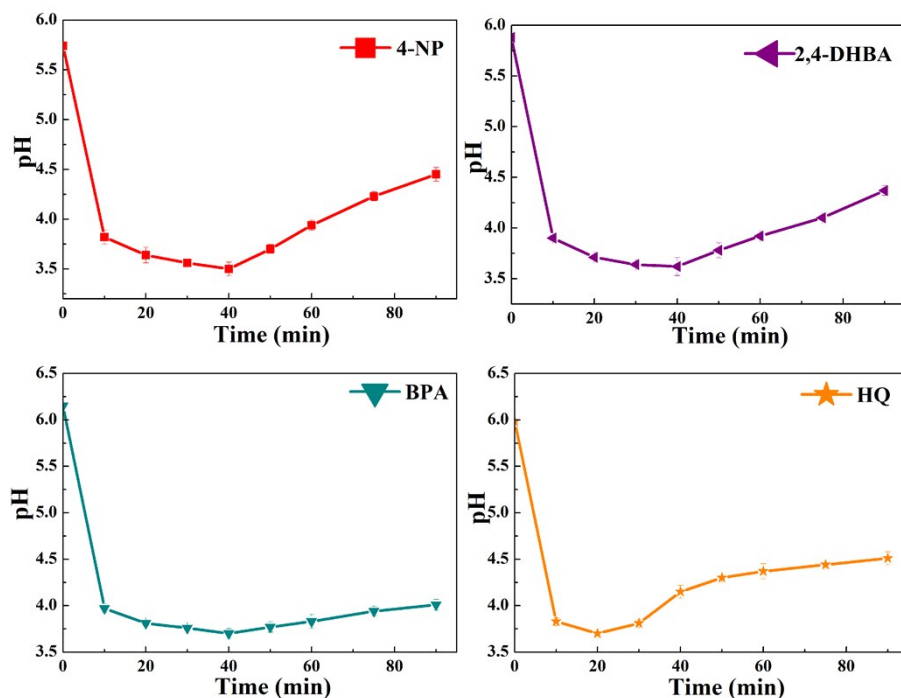

**Fig. S8** Variations of solution pH during different pollutants degradation in  $\text{Mn}^{2+}$ -OCNT/ $\text{O}_3$  system (Experimental conditions: [pollutant] = 20 mg L<sup>-1</sup>, [ $\text{Mn}^{2+}$ -OCNT] = 0.028 g L<sup>-1</sup>, [ $\text{O}_3$ ] = 10 mg L<sup>-1</sup>).

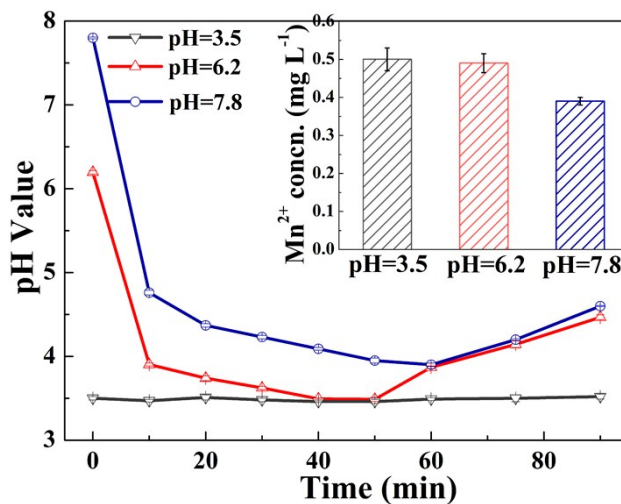

**Fig. S9** Variations of solution pH and the maximum  $\text{Mn}^{2+}$  concentration (the inset in Fig. S9) in the  $\text{Mn}^{2+}$ -OCNT/ $\text{O}_3$  system under different initial solution pH (Experimental conditions: [phenol] = 20 mg L<sup>-1</sup>, [catalyst] = 0.028 g L<sup>-1</sup>, [ $\text{O}_3$ ] = 10 mg L<sup>-1</sup>).



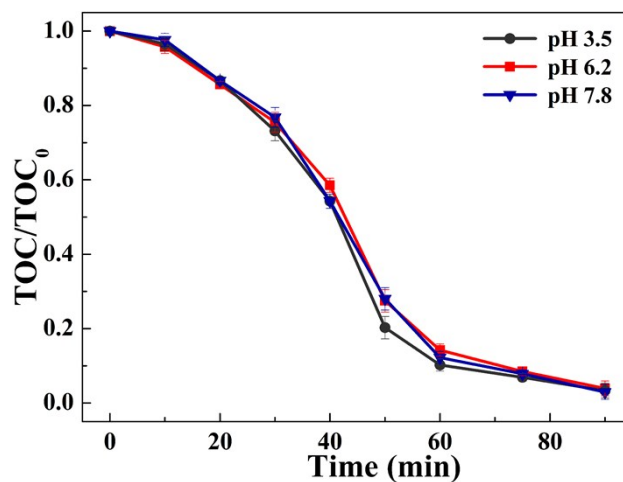

**Fig. S10.** Effect of solution pH on phenol mineralization in homogeneous  $\text{Mn}^{2+}/\text{O}_3$  system (Experimental conditions:  $[\text{phenol}] = 20 \text{ mg L}^{-1}$ ,  $[\text{Mn}^{2+}] = 0.52 \text{ mg L}^{-1}$ ,  $[\text{O}_3] = 10 \text{ mg L}^{-1}$ ).

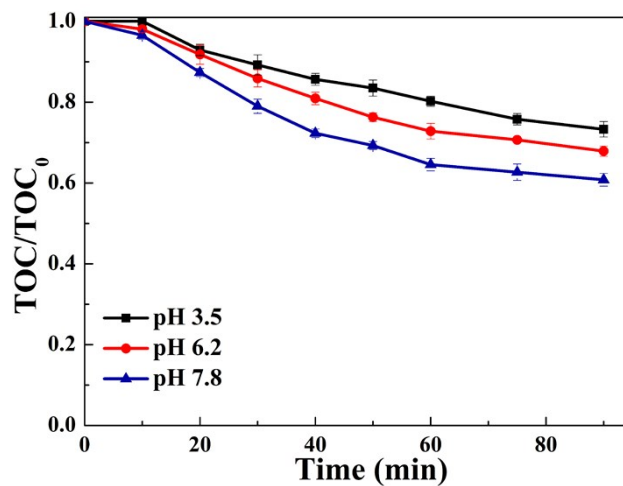

**Fig. S11** Effect of solution pH on mineralization efficiency of phenol in ozonation alone ( $[\text{phenol}] = 20 \text{ mg L}^{-1}$ ,  $[\text{O}_3] = 10 \text{ mg L}^{-1}$ ).

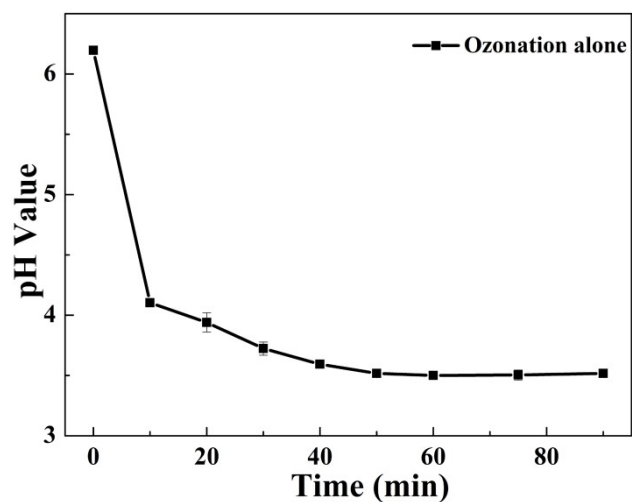

**Fig. S12** Variations of solution pH during phenol degradation in ozonation alone (Experimental conditions: [phenol] = 20 mg L<sup>-1</sup>, [O<sub>3</sub>] = 10 mg L<sup>-1</sup>, initial pH 6.2).

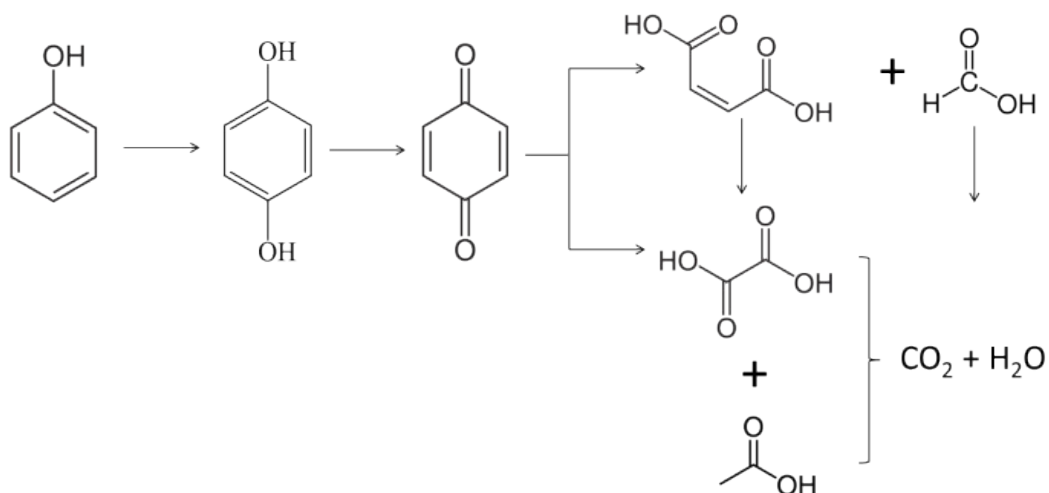

**Fig. S13** Reaction pathway of phenol during catalytic ozonation.

**Table S4** Main intermediates of phenol degradation.

| Retention time (min) | Product        | Molecular structure                                                                   |
|----------------------|----------------|---------------------------------------------------------------------------------------|
| 9.549                | hydroquinone   | 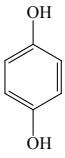   |
| 6.695                | p-benzoquinone |    |
| 7.07                 | formic acid    |    |
| 7.37                 | acetic acid    |    |
| 7.60                 | oxalic acid    |   |
| 8.77                 | maleic acid    |  |

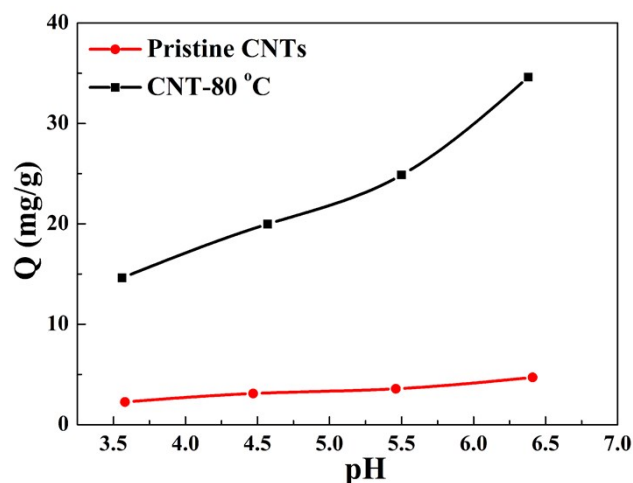

**Fig. S14** Adsorption capacity of  $\text{Mn}^{2+}$  on pristine CNTs and CNT-80 °C (Experimental conditions:  $[\text{initial Mn}^{2+}] = 10 \text{ mg L}^{-1}$ ,  $m/V = 0.1 \text{ g/L}$ ,  $T = \text{room temperature}$ , solution pH was adjusted by 0.01 M NaOH or  $\text{HClO}_4$ ).

To investigate the Mn adsorption capacity on different CNT samples, batch adsorption experiments were carried out under pH 3.5-6.6 and in 0.001-0.1 M  $\text{NaClO}_4$

solutions. The solution pH was adjusted by 0.01 M NaOH or HClO<sub>4</sub>. The suspensions of Mn<sup>2+</sup> and CNTs were shaken for 2 h to achieve the sorption equilibrium. The adsorption capacity (Q, mg/g) of Mn<sup>2+</sup> on CNT surfaces as a function of solution pH was shown in Fig. S14. Under various experimental conditions investigated, the adsorption capacities for Mn<sup>2+</sup> on OCNT are much higher than those on CNT<sub>HNO<sub>3</sub></sub>. Notably, the adsorption capacity of Mn<sup>2+</sup> on OCNT surfaces is mainly dependent on solution pH. The adsorption capacity slowly increases when the solution pH is increased, and achieves the maximum with 37.6 mg g<sup>-1</sup> Mn<sup>2+</sup> adsorbed at pH of 6.4.

**Table S5** Mechanism of homogeneous catalytic ozonation by Mn<sup>2+</sup>.

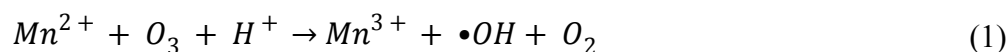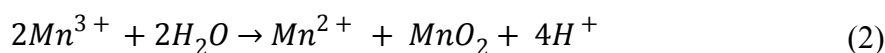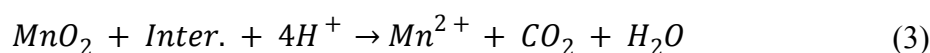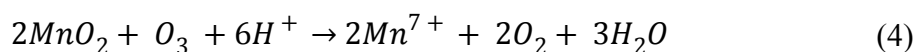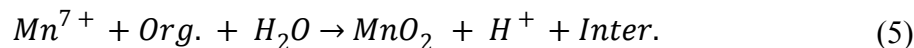

During the homogeneous Mn<sup>2+</sup>/O<sub>3</sub> process, the dissolved Mn<sup>2+</sup> reacts with O<sub>3</sub> to form •OH, which effectively mineralizes organic pollutants. At the same time, Mn<sup>2+</sup> is oxidized into Mn<sup>3+</sup> (Eq. (1)), which possess extremely poor stability in water and can be easily transferred into Mn<sup>2+</sup> and Mn<sup>4+</sup> (Eq. (2)). The Mn<sup>4+</sup> could oxidize the organic intermediates into CO<sub>2</sub> and H<sub>2</sub>O with the simultaneous regeneration of Mn<sup>2+</sup> (Eq. (3)). Alternatively, the generated Mn<sup>4+</sup> could be oxidized into Mn<sup>7+</sup> by O<sub>3</sub> (Eq. (4)) when the pollutant concentrations became low. Mn<sup>7+</sup> is a strong oxidant ( $E^{\circ}$  (MnO<sub>4</sub><sup>-</sup>, 8H<sup>+</sup>/Mn<sup>2+</sup>) = 1.51 V vs NHE), which can easily capture the organic intermediates (Eq. (5)). However, compared with homogeneous Mn<sup>2+</sup>/O<sub>3</sub> system, the concentration of Mn<sup>7+</sup> during the Mn<sup>2+</sup>-OCNT/O<sub>3</sub> system is much lower (as shown in Fig. S15). This indicates little Mn<sup>7+</sup> was generated or the generated Mn<sup>7+</sup> could be consumed immediately during the Mn<sup>2+</sup>-OCNT/O<sub>3</sub> system. With the degradation of organics, solution pH elevated to induce the adsorption of dissolved Mn<sup>2+</sup>, which

could hinder the oxidation of  $\text{Mn}^{2+}$  into  $\text{Mn}^{7+}$ . Moreover, the generated  $\text{Mn}^{7+}$  can react with C, forming  $\text{MnO}_2$  on OCNT surfaces.<sup>2</sup>

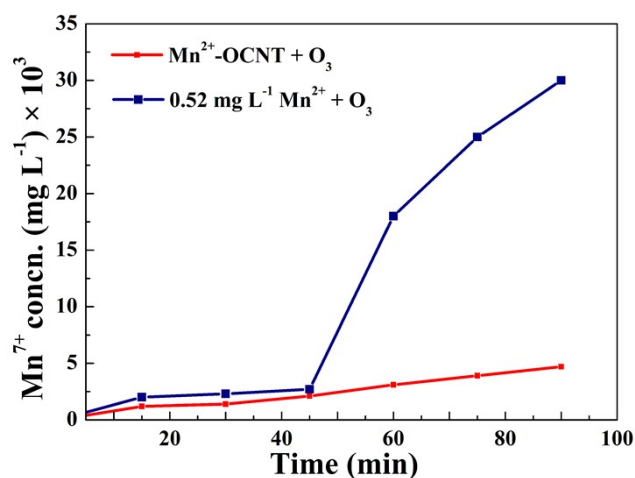

**Fig. S15** The  $\text{Mn}^{7+}$  concentration as a function of time during  $\text{Mn}^{2+}$ -OCNT/ $\text{O}_3$  and homogeneous  $\text{Mn}^{2+}/\text{O}_3$  systems.

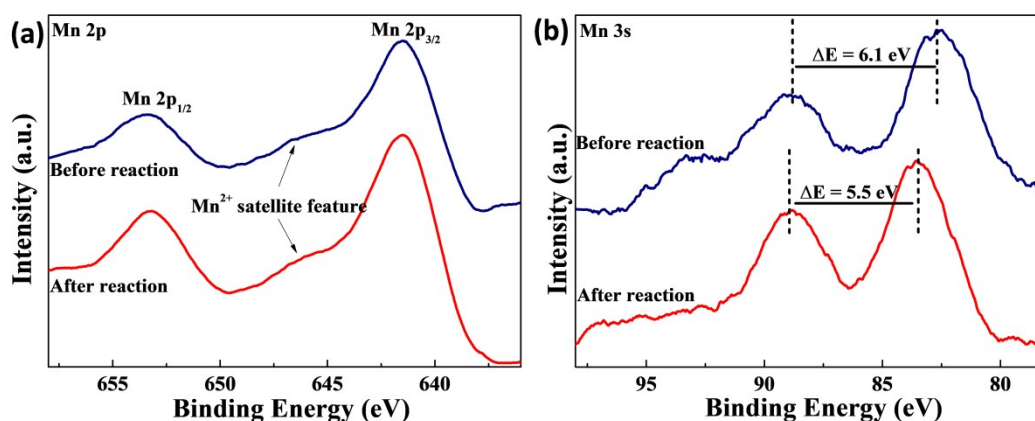

**Fig. S16** Mn 2p (a) and Mn 3s (b) regions of the XPS spectra for the  $\text{Mn}^{2+}$ -OCNT samples before and after the reaction.

To verify the change of Mn chemical state in the  $\text{Mn}^{2+}$ -OCNT/ $\text{O}_3$  system, XPS spectra of  $\text{Mn}^{2+}$ -OCNT before and after reactions were recorded. The Mn 2p spectra (Fig. S16a) of catalysts before and after reactions both show two characteristic peaks at around 653.4 and 641.5 eV, which correspond to the Mn 2p<sub>1/2</sub> and Mn 2p<sub>3/2</sub> spin-orbit components of manganese oxides ( $\text{MnO}_x$ ) respectively.<sup>3,4</sup> The binding energies of Mn 2p<sub>1/2</sub> and Mn 2p<sub>3/2</sub> for  $\text{MnO}_x$  generally lie within a narrow range, thus causing difficulty in the identification of Mn valence state by the sole Mn 2p spectrum.<sup>3,5</sup>

However, the spectra also exhibit a satellite feature at  $\sim 646$  eV which is only presented for  $\text{Mn}^{2+}$ .<sup>6</sup> This result reveals the existence of  $\text{Mn}^{2+}$  on both fresh and used  $\text{Mn}^{2+}$ -OCNT. Notably, it has been reported that the magnitude of peak splitting ( $\Delta E$ ) of Mn 3s peak can be used as a diagnostic characteristic of Mn valence state.<sup>5,7</sup> Therefore, Mn 3s regions of  $\text{Mn}^{2+}$ -OCNT before and after reactions were also collected to attain a straightforward identification of the Mn valence state. By deconvolution of Mn 3s from XPS spectra, the average oxidation state (AOS) of Mn could be determined by the following equation:<sup>8</sup>

$$\text{AOS} = 8.95 - 1.13\Delta E \quad (1-6)$$

Where  $\Delta E$  represents the energy difference between the two main peaks.

Fig. S16b shows two multiple-split components, which result from the coupling of non-ionized 3s electron with 3d valence-band electrons. The  $\Delta E$  value for the fresh  $\text{Mn}^{2+}$ -OCNT is 6.1 eV, which corresponded to an AOS value of 2.06. This result revealed the valence state of Mn on the as-synthesized  $\text{Mn}^{2+}$ -OCNT was  $\text{Mn}^{2+}$ . After reaction, the  $\Delta E$  value slightly reduces to 5.5 eV, corresponding to an AOS of 2.7. This suggests a small portion of  $\text{Mn}^{2+}$  is converted into a relatively high valence state. The  $\text{Mn}^{2+}$  can be converted into  $\text{Mn}^{4+}$  and  $\text{Mn}^{7+}$  when the solution pH is increased. The generated  $\text{Mn}^{7+}$  can react with C, forming  $\text{MnO}_2$  on OCNT surfaces.<sup>2</sup> Consequently, the slight reduction of the  $\Delta E$  value in the Mn 3s spectrum could be attributed to the generation of  $\text{Mn}^{4+}$  on  $\text{Mn}^{2+}$ -OCNT surfaces.

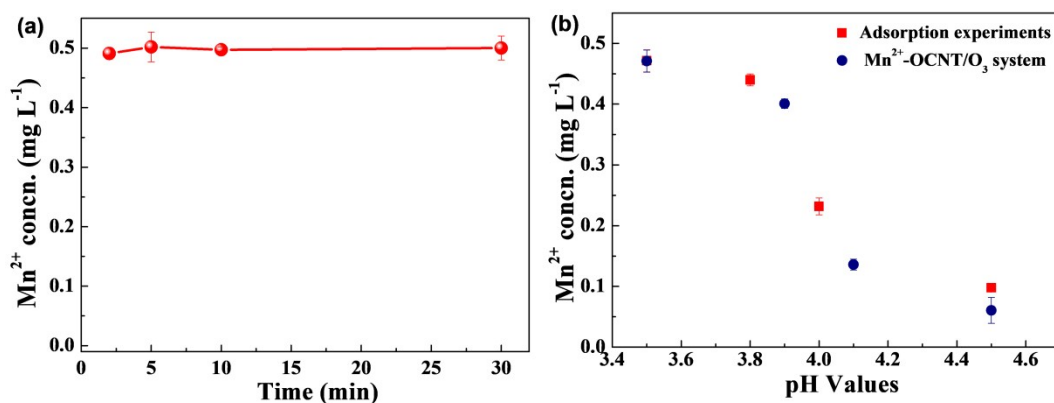

**Fig. S17** Desorption amounts of  $\text{Mn}^{2+}$  as a function of desorption time at pH 3.5 in the  $\text{Mn}^{2+}$ -OCNT suspension (a); Comparisons of desorbed  $\text{Mn}^{2+}$  concentrations during the  $\text{Mn}^{2+}$ -OCNT/ $\text{O}_3$

system and  $\text{Mn}^{2+}$  adsorption experiment as a function of solution pH (b).

To estimate the contribution of each process to the recovery of desorbed  $\text{Mn}^{2+}$  during the  $\text{Mn}^{2+}$ -OCNT/ $\text{O}_3$  system, batch  $\text{Mn}^{2+}$  adsorption experiments were examined in  $\text{Mn}^{2+}$ -OCNT suspension (without the presence of  $\text{O}_3$ ). The pH of the  $\text{Mn}^{2+}$ -OCNT suspension was first adjusted to 3.5 by 0.1 M HCl solution. After the suspension was stirred for 30 min to achieve the  $\text{Mn}^{2+}$  desorption equilibrium,  $\text{Mn}^{2+}$  adsorption experiments were carried out under pH 3.5-4.5. Fig. S17a shows the desorption equilibrium is established as  $< 2.5$  min under pH 3.5, which means  $\text{Mn}^{2+}$  can rapidly desorb from the  $\text{Mn}^{2+}$ -OCNT surfaces. Notably, the desorption amounts of  $\text{Mn}^{2+}$  at pH 3.5 ( $0.47 \text{ mg L}^{-1}$ ) is nearly identical to that of  $\text{Mn}^{2+}$ -OCNT/ $\text{O}_3$  system after 50 min of reaction (pH  $\sim 3.5$ ,  $0.48 \text{ mg L}^{-1}$ ). This further reveals that the dissolved  $\text{Mn}^{2+}$  in the solution is a result of the desorption of  $\text{Mn}^{2+}$  caused by the decreased solution pH during the  $\text{Mn}^{2+}$ -OCNT/ $\text{O}_3$  system. For the  $\text{Mn}^{2+}$  adsorption experiments, Fig. S17b shows when the suspension pH increases from 3.5 to 4.5, the  $\text{Mn}^{2+}$  concentration in the solution is gradually decreased. The recovery ratio of desorbed  $\text{Mn}^{2+}$  at pH value of 3.8, 4.0, and 4.5 is 15%, 56%, and 81%, respectively. Because the solubility product constant ( $K_{\text{sp}}$ ) of  $\text{Mn}(\text{OH})_2(\text{s})$  is  $\sim 2 \times 10^{-13}$ ,  $\text{Mn}^{2+}$  begins to form precipitation at pH  $\sim 10.2$  with the largest  $\text{Mn}^{2+}$  concentration of  $0.52 \text{ mg L}^{-1}$ . This means Mn mainly exists in the form of ionic Mn in the solution under pH range between 3.5 and 4.5. Therefore, it can be concluded that the recovery of  $\text{Mn}^{2+}$  is attributed to the re-adsorption of  $\text{Mn}^{2+}$  during the  $\text{Mn}^{2+}$  adsorption experiment. Fig. S17b also shows that the desorbed  $\text{Mn}^{2+}$  concentrations for  $\text{Mn}^{2+}$  adsorption experiments demonstrate similar changes as the result of  $\text{Mn}^{2+}$ -OCNT/ $\text{O}_3$  system under pH 3.5-4.5. However, although at the same pH of 4.5, the  $\text{Mn}^{2+}$  recovery ratio for the  $\text{Mn}^{2+}$ -OCNT/ $\text{O}_3$  system at 90 min is 88%, slightly higher than 81% for the  $\text{Mn}^{2+}$  adsorption experiment. The contribution of re-adsorption process to  $\text{Mn}^{2+}$  recovery is  $\sim 92\%$  in the  $\text{Mn}^{2+}$ -OCNT/ $\text{O}_3$  system at 90 min.

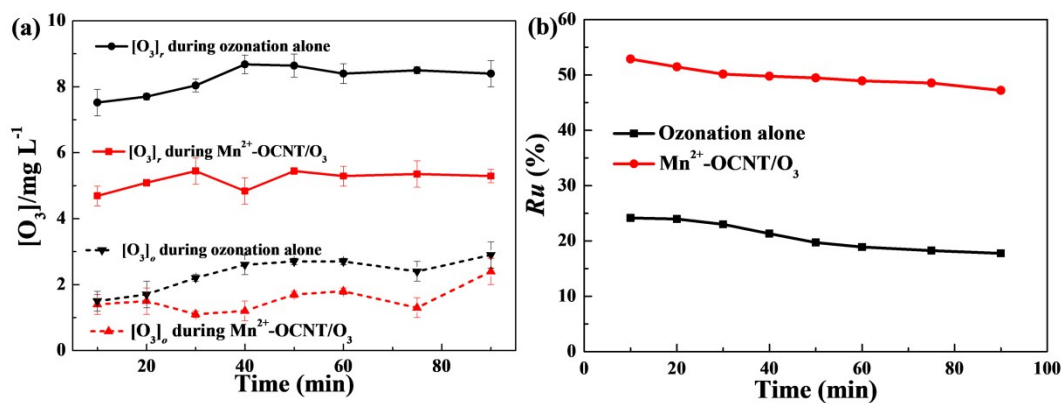

**Fig. S18** Residual ozone [O<sub>3</sub>]<sub>r</sub> and off gas O<sub>3</sub> concentration [O<sub>3</sub>]<sub>o</sub> (a) and the utilization efficiency of O<sub>3</sub> (b) as a function of time in different processes.

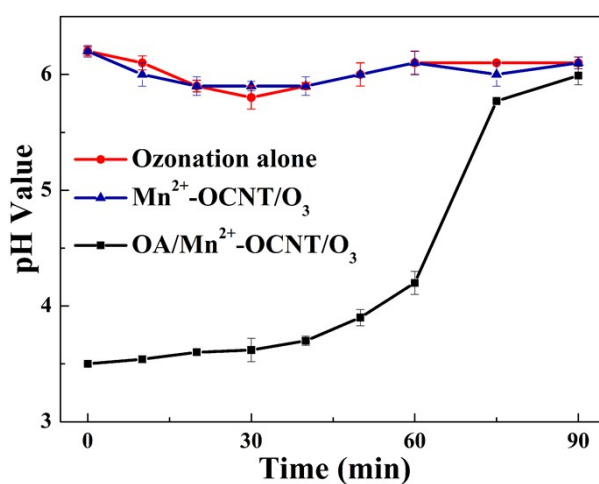

**Fig. S19** Variations of solution pH in different reaction systems (Experimental conditions: [phenol] = 20 mg L<sup>-1</sup>, [Mn<sup>2+</sup>-OCNT] = 0.028 g L<sup>-1</sup> (if used), [O<sub>3</sub>] = 10 mg L<sup>-1</sup>, initial pH 6.2 (except OA/Mn<sup>2+</sup>-OCNT/O<sub>3</sub> system)).

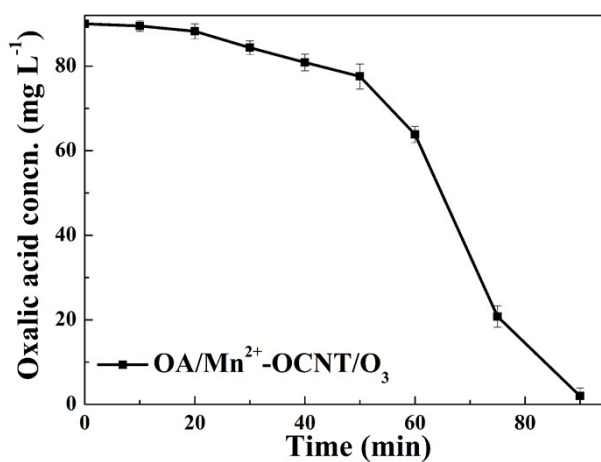

**Fig. S20** The change of oxalic acid concentration during OA/Mn<sup>2+</sup>-OCNT/O<sub>3</sub> system (Experimental conditions: [phenol] = 20 mg L<sup>-1</sup>, [Mn<sup>2+</sup>-OCNT] = 0.028 g L<sup>-1</sup>, [O<sub>3</sub>] = 10 mg L<sup>-1</sup>).



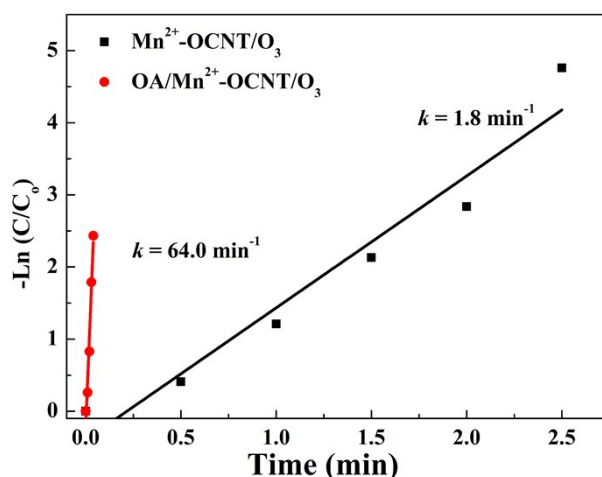

**Fig. S21** Kinetics of phenol degradation in different reaction systems (Experimental conditions:  $[\text{phenol}] = 500 \mu\text{g L}^{-1}$ ,  $[\text{Mn}^{2+}\text{-OCNT}] = 0.028 \text{ g L}^{-1}$ ,  $[\text{O}_3] = 10 \text{ mg L}^{-1}$ ).

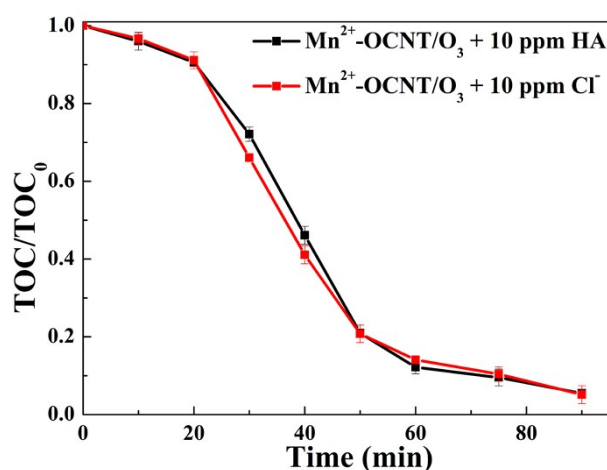

**Fig. S22** Mineralization efficiencies of phenol in different reaction systems (Experimental conditions:  $[\text{phenol}] = 20 \text{ mg L}^{-1}$ ,  $[\text{Mn}^{2+}\text{-OCNT}] = 0.028 \text{ g L}^{-1}$ ,  $[\text{O}_3] = 10 \text{ mg L}^{-1}$ , initial pH 6.2)

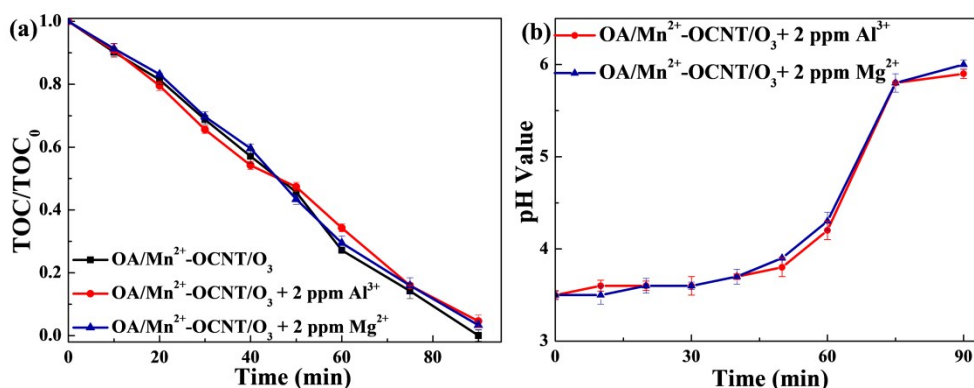

**Fig. S23** Mineralization efficiencies of phenol in different reaction systems (a); Variations of solution pH in different reaction systems (b) (Experimental conditions:  $[\text{phenol}] = 20 \text{ mg L}^{-1}$ ,  $[\text{Mn}^{2+}\text{-OCNT}] = 0.028 \text{ g L}^{-1}$ ,  $[\text{O}_3] = 10 \text{ mg L}^{-1}$ , initial pH 6.2 buffered with 3 mM NaOH/KH<sub>2</sub>PO<sub>4</sub>).

**Table S6** The parameters of the wastewater quality.

| COD                     | TOC                     | conductivity            | pH  |
|-------------------------|-------------------------|-------------------------|-----|
| 91.2 mg L <sup>-1</sup> | 33.6 mg L <sup>-1</sup> | 2.0 ms cm <sup>-1</sup> | 7.8 |

**Table S7** The metal ions in the wastewater.

| ion species            | Concentration (mg L <sup>-1</sup> ) |
|------------------------|-------------------------------------|
| Na <sup>+</sup>        | 1030.4                              |
| K <sup>+</sup>         | 540.0                               |
| Mg <sup>2+</sup>       | 27.0                                |
| Zn <sup>2+</sup>       | /                                   |
| Ca <sup>2+</sup>       | 90.4                                |
| Mn <sup>2+</sup>       | 0.09                                |
| Fe <sup>(2+, 3+)</sup> | 0.004                               |
| Cu <sup>(1+, 2+)</sup> | /                                   |
| Al <sup>3+</sup>       | /                                   |
| Total Cd               | 0.002                               |
| Total Cr               | /                                   |

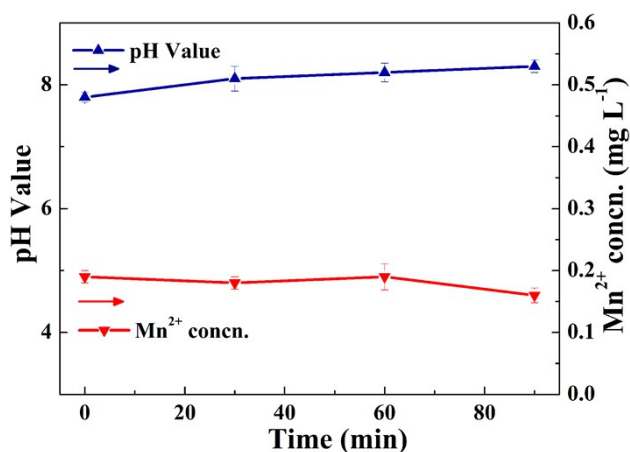**Fig. S24** Variations of solution pH and dissolved Mn<sup>2+</sup> concentration as a function of time during the Mn<sup>2+</sup>-OCNT/O<sub>3</sub> system (Experimental conditions: [Mn<sup>2+</sup>-OCNT] = 0.028 g L<sup>-1</sup>, [O<sub>3</sub>] = 10 mg L<sup>-1</sup>).

## REFERENCE

- (1) Li, X. Y.; Cui, Y. H.; Feng, Y. J.; Xie, Z. M.; Gu, J. D. Reaction pathways and mechanisms of the electrochemical degradation of phenol on different electrodes. *Water Res.*, **2005**, 39 (10), 1972-1981.
- (2) Gan, Z. X.; Xiong, S. J.; Wu, X. L.; He, C. Y.; Shen, J. C.; Chu, P. K. Mn<sup>2+</sup>-bonded reduced graphene oxide with strong radiative recombination in broad visible range caused by resonant energy transfer. *Nano lett.* 2011, 11 (9), 3951-3956.
- (3) Tan, B. J.; Klabunde, K. J.; Sherwood, P. M. XPS studies of solvated metal atom dispersed (SMAD) catalysts. Evidence for layered cobalt-manganese particles on alumina and silica. *J. Am. Chem. Soc.* **1991**, 113 (3), 855-861.
- (4) Lei, Z.; Zhang, J.; Zhao, X. S. Ultrathin MnO<sub>2</sub> nanofibers grown on graphitic carbon spheres as high-performance asymmetric supercapacitor electrodes. *J. Mater. Chem.* **2012**, 22 (1), 153-160.
- (5) Thermo scientific XPS. <https://xpssimplified.com/elements/manganese.php>.
- (6) Wang, J.; Chen, S.; Quan, X.; Yu, H. T. Fluorine-doped carbon nanotubes as an efficient metal-free catalyst for destruction of organic pollutants in catalytic ozonation. *Chemosphere* **2018**, 190, 135-143
- (7) Toupin, M.; Brousse, T.; Bélanger, D. Influence of microstructure on the charge storage properties of chemically synthesized manganese dioxide. *Chem. Mater.* **2002**, 14 (9), 3946-3952.
- (8) Andreozzi, R.; Caprio, V.; Marotta, R.; Tufano, V. Kinetic modeling of pyruvic acid ozonation in aqueous solutions catalyzed by Mn (II) and Mn (IV) ions. *Water Res.* **2001**. 35 (1), 109-120.
